# Supplementary material for: Achieving ultra-dispersed 1T-Co-MoS2@HMCS via space-confined engineering for highly efficient hydrogen evolution in the universal pH range
Source: Royal Society of Chemistry journal article supplement (doi:10.1039/d2qi00269h), 2022-01-01
Supplement: d2qi00269h1.pdf [file d2qi00269h1.pdf]

## Supporting information

### **Achieving ultra-dispersed 1T-Co-MoS<sub>2</sub>@HMCS via space-confined engineering for highly efficient hydrogen evolution in universal pH**

Changle Yue<sup>a</sup>, Yan Zhou<sup>b</sup>, Yang Liu<sup>a</sup>, Chao Feng<sup>a</sup>, Wenjing Bao<sup>a</sup>, Fengyue Sun<sup>a</sup>,  
Yongxiao Tuo<sup>b</sup>, Yuan Pan<sup>a</sup>, Yunqi Liu<sup>a</sup>, Yukun Lu<sup>a,\*</sup>

*<sup>a</sup>State Key Laboratory of Heavy Oil Processing, College of Chemistry and Chemical Engineering, China University of Petroleum (East China), Qingdao 266580, PR China*

*<sup>b</sup>School of Materials Science and Engineering, China University of Petroleum (East China), Qingdao 266580, PR China*

Corresponding authors:

**E-mail addresses:** lyk@upc.edu.cn (Yukun Lu),

## Table of contents

### ◆ Experiment section

#### 1. Chemicals and reagents

#### 2. Experimental section

##### 2.1 Preparation of HMCS

##### 2.2 Preparation of $(\text{NH}_4)_6[\text{Co}_2\text{Mo}_{10}\text{H}_4\text{O}_{38}] \cdot 4\text{H}_2\text{O}$ ( $\text{Co}_2\text{Mo}_{10}$ )

##### 2.3 Synthesis of $(\text{Co}_2\text{Mo}_{10})(\text{HM})_3@$ HMCS

##### 2.4 Synthesis of 1T-Co-MoS<sub>2</sub>@HMCS

##### 2.5 Synthesis of Co-MoS<sub>2</sub>@HMCS

##### 2.6 Synthesis of Co-MoS<sub>2</sub>

##### 2.7 Synthesis of MoS<sub>2</sub>@HMCS and CoS@HMCS

##### 2.8 Synthesis of 2H-MoS<sub>2</sub>

##### 2.9 Structural characterizations

##### 2.10 Electrochemical characterizations

##### 2.11 Computational methods

#### Reference

### ◆ Supporting Figures and Tables

**Fig. S1.** (a) XRD patterns for  $\text{Co}_2\text{Mo}_{10}$  and  $(\text{Co}_2\text{Mo}_{10})(\text{HM})_3@$ HMCS, (b) FT-IR spectra for both  $\text{Co}_2\text{Mo}_{10}$  and  $(\text{Co}_2\text{Mo}_{10})(\text{HM})_3@$ HMCS.

**Fig. S2.** (a) XRD patterns for HMCS, (b) IR spectra for both HMCS and  $\text{SiO}_2@$ C, the selected areas represent the vibrational bands for C=C and Si-O-C bonds.

**Fig. S3.** TEM image (a) and HRTEM images (b and c) of Co-MoS<sub>2</sub>@HMCS.

**Fig. S4.** HRTEM images of 1T-Co-MoS<sub>2</sub>@HMCS.

**Fig. S5.** (a) Nitrogen adsorption-desorption isotherms and (b) BJH pore distribution of HMCS, (c) Nitrogen adsorption-desorption isotherms and (d) BJH pore distribution of 1T-Co-MoS<sub>2</sub>@HMCS.

**Fig. S6.** Raman spectrum of 1T-Co-MoS<sub>2</sub>@HMCS.

**Fig. S7.** (a) Full XPS spectrum and (b) high-resolution XPS spectra of Co 2p in 1T-Co-MoS<sub>2</sub>@HMCS catalyst.

**Fig. S8.** High-resolution XPS spectra of Mo 3d in MoS<sub>2</sub>@HMCS (a), Co-MoS<sub>2</sub>@HMCS (b) and Co-MoS<sub>2</sub> (c).

**Fig. S9.** High-resolution XPS spectra of S 2p in MoS<sub>2</sub>@HMCS (a), Co-MoS<sub>2</sub>@HMCS (b) and Co-MoS<sub>2</sub> (c).

**Fig. S10.** Raman spectrum of MoS<sub>2</sub>@HMCS, Co-MoS<sub>2</sub>@HMCS and Co-MoS<sub>2</sub>.

**Fig. S11.** Electrochemical impedance spectroscopy (EIS) of 1T-Co-MoS<sub>2</sub>@HMCS, Co-MoS<sub>2</sub>@HMCS, (Co<sub>2</sub>Mo<sub>10</sub>)(HM)<sub>3</sub>@HMCS, Co-MoS<sub>2</sub> and HMCS tested in (a) 1.0 M KOH and (b) 0.5 M H<sub>2</sub>SO<sub>4</sub>.

**Fig. S12.** Double-layer capacitance ( $C_{dl}$ ) determined by plotting capacitive currents as function of scan rate in alkaline (a) and acidic solutions (b).

**Fig. S13.** CVs with different scan rates of different catalysts in 1.0 M KOH and 0.5 M H<sub>2</sub>SO<sub>4</sub>.

**Fig. S14.** HER polarization curves of different catalysts in 1.0 M KOH (a) and 0.5 M H<sub>2</sub>SO<sub>4</sub>.

**Fig. S15.** HER polarization curves of 1T-Co-MoS<sub>2</sub>@HMCS in different solutions.

**Fig. S16.** The calculation model of 1T-MoS<sub>2</sub> and 1T-Co-MoS<sub>2</sub>.

**Fig. S17.** The adsorption model of 1T-MoS<sub>2</sub> and 1T-Co-MoS<sub>2</sub> in acidic condition.

**Fig. S18.** The adsorption model of 1T-MoS<sub>2</sub> and 1T-Co-MoS<sub>2</sub> in alkaline condition.

**Fig. S19.** Charge density diagram of 1T-Co-MoS<sub>2</sub>.

**Fig. S20.** Schematic of DOS and PDOS with different edges of 1T-MoS<sub>2</sub> and 1T-Co-MoS<sub>2</sub>.

**Fig. S21.** Band structure of the effective model for the d bands of 1T-MoS<sub>2</sub>, Co-S basal site and Co-S edge site of 1T-Co-MoS<sub>2</sub>.

**Table S1.** Comparison of HER Performance of 1T-Co-MoS<sub>2</sub>@HMCS with Reported Electrocatalysts in 1.0 M KOH.

**Table S2.** Comparison of HER performance of 1T-Co-MoS<sub>2</sub>@HMCS with reported electrocatalysts in 0.5 M H<sub>2</sub>SO<sub>4</sub>.

## Experimental

### 1. Chemicals and reagents

(NH<sub>4</sub>)<sub>6</sub>Mo<sub>7</sub>O<sub>24</sub>·4H<sub>2</sub>O (99%), C<sub>12</sub>H<sub>30</sub>Br<sub>2</sub>N<sub>2</sub> (hexamethonium bromide, HMB, 99%), C<sub>6</sub>H<sub>6</sub>O<sub>2</sub> (resorcinol, 99%) and C<sub>12</sub>H<sub>28</sub>O<sub>4</sub>Si (tetrapropoxysilane, TPOS, 97%) were purchased from Sangon Biotech (Shanghai, China). Co(CH<sub>3</sub>COO)<sub>2</sub>·4H<sub>2</sub>O (cobalt acetate tetrahydrate, AR, 99.5%), activated charcoal (200 mesh powder), CH<sub>2</sub>O (formaldehyde solution, AR, 37% wt in water), HF (hydrofluoric acid, AR, 40.0%), C<sub>2</sub>H<sub>6</sub>O (ethanol, AR, ≥99.7%), KOH (potassium hydroxide, 95%), CH<sub>4</sub>N<sub>2</sub>S (thiourea, AR, 99%), MoO<sub>3</sub> (molybdenum oxide, AR, 99.5%) and NH<sub>3</sub>·H<sub>2</sub>O (ammonium hydroxide solution, AR, 25 ~ 28%) were purchased from Macklin Biochem (Shanghai, China). H<sub>2</sub>O<sub>2</sub> solution (Hydrogen peroxide solution, 30% wt in water) was purchased from Aladdin Biochem (Shanghai, China). H<sub>2</sub>SO<sub>4</sub> (sulfuric acid, AR, 95 ~ 98%) and Nafion117 solution (~ 5% in a mixture of lower aliphatic alcohols and water) were purchased from Sinopharm Chem (Shanghai, China). 20% Pt/C catalysts was purchased from Alfa Aesar (Tianjin, China). All aqueous solutions were prepared with water from a Milli-Q Pore water system (18.2 MΩ).

### 2. Experimental section

All the chemicals used in this study were purchased without any further purification.

#### 2.1 Preparation of HMCS

HMCS was synthesized according to the published procedure.<sup>[1]</sup> 6.00 mL NH<sub>3</sub>·H<sub>2</sub>O was added to 160 mL aqueous solution of ethanol (V<sub>ethanol</sub>: V<sub>water</sub> = 7: 1) to obtain an alkaline environment. After sufficient magnetically stirring, 7.00 mL TPOS (24.2 mmol) was added slowly to the solution and stirring for 30 min. 1.12 mL CH<sub>2</sub>O (13.8 mmol) solution and 0.800 g C<sub>6</sub>H<sub>6</sub>O<sub>2</sub> (7.27 mmol) dissolved in 4.00 mL ethanol by ultrasonic were slowly dropped into the above solution. After stirring for 24 h at room temperature, the light yellow SiO<sub>2</sub> precipitates were separated from the creamy white solution by centrifugation and dried at 60 °C. The SiO<sub>2</sub> powder was then carbonized at 900 °C for 4 h under N<sub>2</sub> (99.999%) atmosphere with a heating rate of 5 °C/min, followed

by natural cooling to produce black SiO<sub>2</sub>@C spheres. The black HMCS powder could be obtained by SiO<sub>2</sub>@C spheres stirred in a 13% wt. HF solution for 2 days.

## 2.2 Preparation of (NH<sub>4</sub>)<sub>6</sub>[Co<sub>2</sub>Mo<sub>10</sub>H<sub>4</sub>O<sub>38</sub>]·4H<sub>2</sub>O (Co<sub>2</sub>Mo<sub>10</sub>)

Ammonium salt of decamolybdodicobaltate Co<sub>2</sub>Mo<sub>10</sub> was synthesized according to the published procedure.<sup>[2]</sup> 15.0 g (12.1 mmol) (NH<sub>4</sub>)<sub>6</sub>Mo<sub>7</sub>O<sub>24</sub>·4H<sub>2</sub>O and 3.10 g (12.4 mmol) Co(CH<sub>3</sub>COO)<sub>2</sub>·4H<sub>2</sub>O were dissolved in 125 mL water, then 3.00 g active charcoal and 20.0 mL peroxide solution (18%) were added to the solution. After boiling the black solution for 1 h, the active charcoal was separated by filtration. Dark-green Co<sub>2</sub>Mo<sub>10</sub> crystals were obtained by slow evaporation of the solvent at room temperature.

## 2.3 Synthesis of (Co<sub>2</sub>Mo<sub>10</sub>)(HM)<sub>3</sub>@HMCS

Co<sub>2</sub>Mo<sub>10</sub> was used as the Co source and Mo source. 0.248 g (0.133 mmol) Co<sub>2</sub>Mo<sub>10</sub> and 0.144 g (0.399 mmol) hexamethonium (HM) bromide were dissolved in 20.0 mL deionized water. Then, 30.0 mg HMCS was added to the clear green solution and stirred at room temperature for 12 h to obtain (Co<sub>2</sub>Mo<sub>10</sub>)(HM)<sub>3</sub>@HMCS. The black (Co<sub>2</sub>Mo<sub>10</sub>)(HM)<sub>3</sub>@HMCS precipitates were separated by centrifugation, washed by deionized water several times and dried at 60 °C for 24 h.

## 2.4 Synthesis of 1T-Co-MoS<sub>2</sub>@HMCS

1T-Co-MoS<sub>2</sub>@HMCS was obtained through calcining (Co<sub>2</sub>Mo<sub>10</sub>)(HM)<sub>3</sub>@HMCS under 10% vol. H<sub>2</sub>S/H<sub>2</sub> at 400 °C for 4 h with the heating rate of 5 °C/min.

## 2.5 Synthesis of Co-MoS<sub>2</sub>@HMCS

Co-MoS<sub>2</sub>@HMCS was obtained without HM compared with 1T-Co-MoS<sub>2</sub>@HMCS. 0.248 g (0.133 mmol) Co<sub>2</sub>Mo<sub>10</sub> was dissolved in 20 mL deionized water for 30 min. Then, 30.0 mg HMCS was added to the above solution and stirred for 12 h. The black as-synthesized product was separated by centrifugation, washed by deionized water several times and then dried at 60 °C for 24 h. Then the prepared sample was further calcined under 10% vol. H<sub>2</sub>S/H<sub>2</sub> at 400 °C for 4 h with the heating rate of 5 °C/min, followed by natural cooling to produce Co-MoS<sub>2</sub>@HMCS powder.

## 2.6 Synthesis of Co-MoS<sub>2</sub>

Co-MoS<sub>2</sub> was prepared by calcining the Co<sub>2</sub>Mo<sub>10</sub> at 400 °C for 4 h with the heating

rate of 5 °C/min under 10% vol. H<sub>2</sub>S/H<sub>2</sub> atmosphere.

## 2.7 Synthesis of MoS<sub>2</sub>@HMCS and CoS@HMCS

0.282 g (0.228 mmol) (NH<sub>4</sub>)<sub>6</sub>Mo<sub>7</sub>O<sub>24</sub>·4H<sub>2</sub>O or 0.398 g (1.60 mmol) Co(CH<sub>3</sub>COO)<sub>2</sub>·4H<sub>2</sub>O was dissolved in 20.0 mL deionized water containing 0.144 g (0.399 mmol) hexamethonium (HM) bromide for 30 min. Then 30.0 mg HMCS was added to the above solution and stirred for 12 h. The as-synthesized product was separated by centrifugation and washed by deionized water several times and then dried at 60 °C for 24 h. Then the prepared sample was further calcined under 10% vol. H<sub>2</sub>S/H<sub>2</sub> at 400 °C for 4 h with the heating rate of 5 °C/min, followed by natural cooling to produce MoS<sub>2</sub>@HMCS or CoS@HMCS powder.

## 2.8 Synthesis of 2H-MoS<sub>2</sub>

Hydrothermal synthesis in a sealed autoclave system was used for preparation of 2H-MoS<sub>2</sub>. First, 1.44 g (10 mmol) MoO<sub>3</sub> and 3.04 g (40 mmol) CH<sub>4</sub>N<sub>2</sub>S were dispersed in 70 mL deionized water under stirring to form a homogeneous solution. Then, the above solution was transferred into a 100 ml Teflon-lined stainless steel autoclave, kept at 220 °C for 12 h. The final product was purified with deionized water for several times and dried at 60 °C.

## 2.9 Structural characterizations

X-ray powder diffraction (XRD) patterns of the products were tested with an X-ray diffractometer (BRUKER D8 ADVANCE) by Cu K $\alpha$  radiation ( $\lambda = 1.5418 \text{ \AA}$ , 40 kV, 40 mA) at room temperature. Scanning electron microscope (SEM) images of the products were captured by a field-emission SEM (JMS-7900F). High-resolution transmission electron microscopy (HRTEM), energy dispersive X-ray spectroscopy (EDX) images and annular dark-field STEM of the products were obtained by HRTEM (JEM-2100F). The Fourier transform infrared spectroscopy (FT-IR) was recorded on a VERTEX 80 V FT-IR spectrometer. The chemical states of the sample were determined by X-ray photoelectron spectroscopy (XPS) with a Thermo VG ESCALAB250XI surface analysis system. N<sub>2</sub> adsorption-desorption isotherms were obtained using a Quantachrome Autosorb-1-MP analyzer at 77 K and the specific surface area was calculated automatically using a multipoint Brunauer-Emmett-Teller (BET) model.

Raman spectra of the catalysts were recorded on a Senterra laser Raman spectrometer ( $\lambda = 532$  nm) equipped with an optical microscope in confocal mode.

## 2.10 Electrochemical characterizations

All of the electrochemical performance tests in 1.0 M KOH and 0.5 M H<sub>2</sub>SO<sub>4</sub> electrolyte media were performed on Gamry INTERFACE 1000 E, USA, using an Saturated calomel electrode (SCE) electrode, a graphite rod, and as-prepared bimetal sulfide electrodes as the reference electrode, the counter electrode, and the working electrode, respectively. All polarization curves at 2 mV·s<sup>-1</sup> were iR compensated. The linear sweep voltammetry (LSV) measurements were recorded with a scan rate of 2 mV·s<sup>-1</sup>. The cyclic voltammetry (CV) measurements were carried out with different sweep rates between 40 and 200 mV·s<sup>-1</sup>. The long-term stability tests were performed by CV tests at the scan rate of 100 mV·s<sup>-1</sup>. The electrochemical Impedance Spectroscopy (EIS) tests were measured by ac impedance spectroscopy in the frequency range of 10<sup>0</sup> to 1 Hz. According to the Nernst equation  $E_{\text{RHE}} = E_{\text{SCE}} + 0.059\text{pH} + 0.254$ , where  $E_{\text{RHE}}$  is the potential vs a reversible hydrogen electrode,  $E_{\text{SCE}}$  is the potential vs an SCE electrode, and pH is the pH value of the electrolyte.

The surface of the glassy carbon electrode (GCE, 3 mm diameter) was polished with 0.3  $\mu\text{m}$  alumina slurries, and sonicated with deionized water and ethanol. Then the electrode was dried at 25 °C. To prepare the modified electrodes, 5.0 mg of the electrocatalyst was dispersed into 1.005 mL of Nafion solution [5.0  $\mu\text{L}$  Nafion (5%) dissolved in 1.000 mL of ethanol] to give homogeneous suspension upon bath sonication. A drop 20.0  $\mu\text{L}$  of the suspension was dropped onto GCE surface and the electrode was dried at 25 °C.

## 2.11 Computational methods

Spin-polarized density functional theory (DFT) calculations were performed using Vienna ab initio simulation packages (VASP) and employed using the generalized gradient approximation (GGA) with Perdew-Burke-Ernzerhof (PBE) functional to describe the exchange and correlation energy in all calculations.<sup>[3]</sup> The projector-augmented wave (PAW) method was used to represent the interactions between valence electrons and ionic cores. The plane wave cutoff energy was fixed at 400 eV. To model

the MoS<sub>2</sub>-Co, a 1T-MoS<sub>2</sub> slab with exposed [001] surface was used, resulting in the model with the lowest lattice mismatch for following calculation. The supercell consists of 3 × 3 unit cells for MoS<sub>2</sub> slab, with a 10 Å vacuum region to simulate the adsorption. The all layers together with the adsorbates were fully relax in all dimensions until the maximum force on a single atom was smaller than 0.03 eV·Å<sup>-1</sup> and the convergence of energy and forces were set to 1×10<sup>-4</sup> Ha. The Brillouin zone was sampled by the Monkhorst-Pack method with an 8 × 8 × 1 k-point mesh.

For hydrogen evolution reaction (HER) in acid environment, the reaction Gibbs free energy ( $\Delta G_H^*$ ) can be calculated as follows: [4, 5]

$$\Delta G_H^* = \Delta E_H + \Delta E_{ZPE} - T\Delta S_H$$

where  $\Delta E_H$ ,  $\Delta E_{ZPE}$ , and  $\Delta S_H$  are the adsorption energy of hydrogen, the zero-point energy difference and the entropy difference. In standard conditions,  $\Delta E_{ZPE} - T\Delta S_H$  is about 0.24 eV, hence ( $\Delta G_H^*$ ) can be calculated by  $\Delta E_H + 0.24$ .

The (OER) in alkali environment follows three elementary steps. The free energies of the intermediates at 298.15 K were obtained by:

$$\Delta G_H = \Delta E + \Delta E_{ZPE} - T\Delta S_H + eU$$

Where  $\Delta E_{ZPE}$ ,  $\Delta S$  and  $U$  are the zero-point energy changes, entropy changes and applied potentials. And  $\Delta E$  is the binding energy of adsorption species HO\*, O\* and HOO\*, with defined as follows:

$$\Delta E = E_{\text{substrate+adsorbate}} - E_{\text{substrate}} - E_{\text{adsorbate}}$$

## References

- [1] X.K. Wan, H.B. Wu, B.Y. Guan, D. Luan, X.W. Lou, Confining Sub-Nanometer Pt Clusters in Hollow Mesoporous Carbon Spheres for Boosting Hydrogen Evolution Activity, *Adv. Mater.*, 32 (2020) 1901349.
- [2] P.A. Nikulshin, A.V. Mozhaev, K.I. Maslakov, A.A. Pimerzin, V.M. Kogan, Genesis of HDT catalysts prepared with the use of Co<sub>2</sub>Mo<sub>10</sub>HPA and cobalt citrate: Study of their gas and liquid phase sulfidation, *Appl. Catal. B: Environ.*, 158-159 (2014) 161-174.
- [3] Z. Liu, C. Chen, J. Zhao, L. Yang, K. Sun, L. Zeng, Y. Pan, Y. Liu, C. Liu, Study



on the  $\text{NO}_2$  production pathways and the role of  $\text{NO}_2$  in fast selective catalytic reduction  $\text{DeNO}_x$  at low-temperature over  $\text{MnO}_x/\text{TiO}_2$  catalyst, *Chemical Engineering Journal*, 379 (2020) N.PAG-N.PAG.

[4] K. Sun, Y. Liu, Y. Pan, H. Zhu, J. Zhao, L. Zeng, Z. Liu, C. Liu, Targeted bottom-up synthesis of 1T-phase  $\text{MoS}_2$  arrays with high electrocatalytic hydrogen evolution activity by simultaneous structure and morphology engineering, *Nano Research*, 11 (2018) 4368-4379.

[5] T. Xiong, X. Yuan, H. Wang, L. Jiang, Z. Wu, H. Wang, X. Cao, Integrating the (311) facet of  $\text{MnO}_2$  and the functional groups of poly(m-phenylenediamine) in core-shell  $\text{MnO}_2@$ poly(m-phenylenediamine) adsorbent to remove Pb ions from water, *J. Hazard. Mater.*, 389 (2020) 122154.

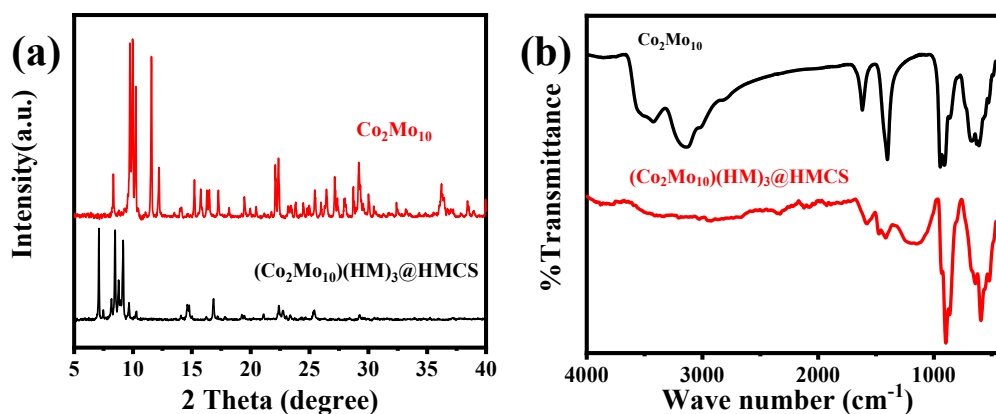

**Fig. S1.** (a) XRD patterns for  $\text{Co}_2\text{Mo}_{10}$  and  $(\text{Co}_2\text{Mo}_{10})(\text{HM})_3@$ HMCS, (b) FT-IR

spectra for both  $\text{Co}_2\text{Mo}_{10}$  and  $(\text{Co}_2\text{Mo}_{10})(\text{HM})_3@\text{HMCS}$

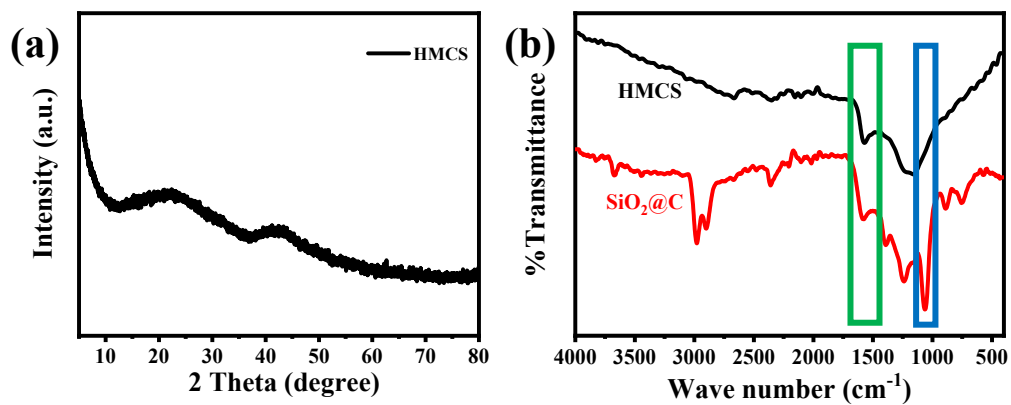

**Fig. S2.** (a) XRD patterns for HMCS, (b) IR spectra for both HMCS and  $\text{SiO}_2@\text{C}$ , the selected areas represent the vibrational bands for C=C and Si-O-C bonds.

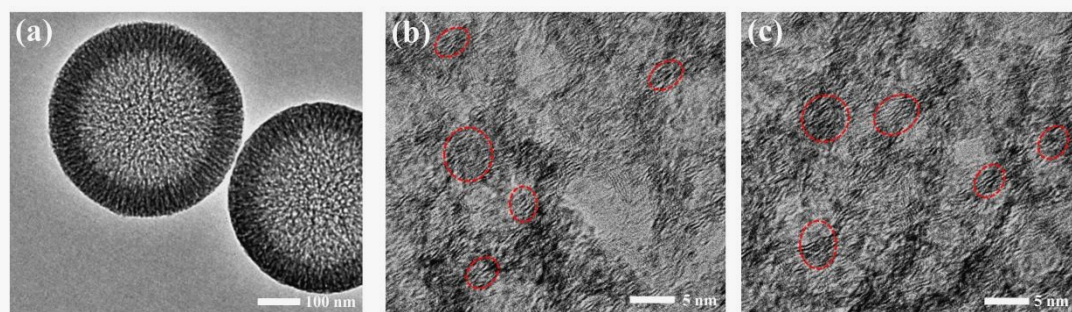

**Fig. S3.** TEM image (a) and HRTEM images (b and c) of  $\text{Co-MoS}_2@\text{HMCS}$

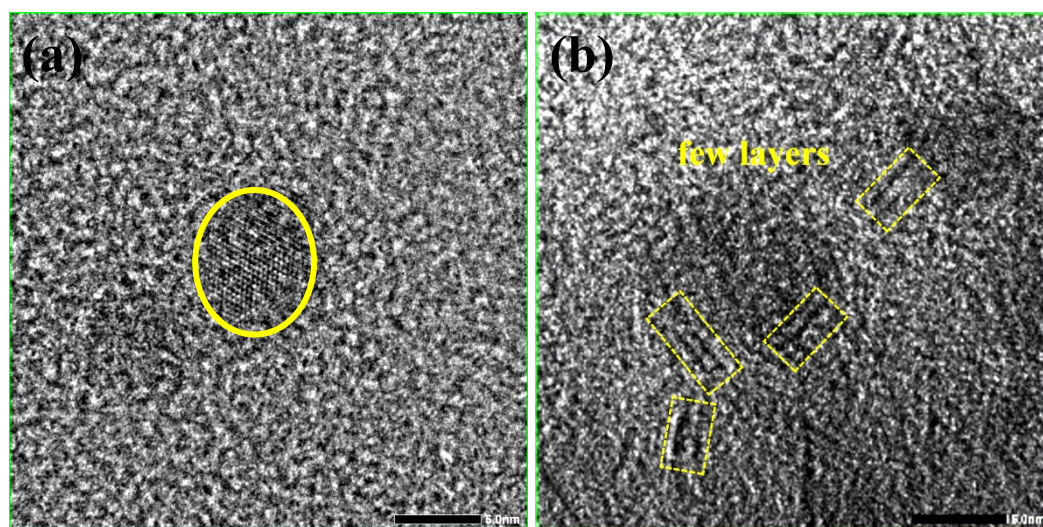

**Fig. S4.** HRTEM images of 1T-Co-MoS<sub>2</sub>@HMCS.

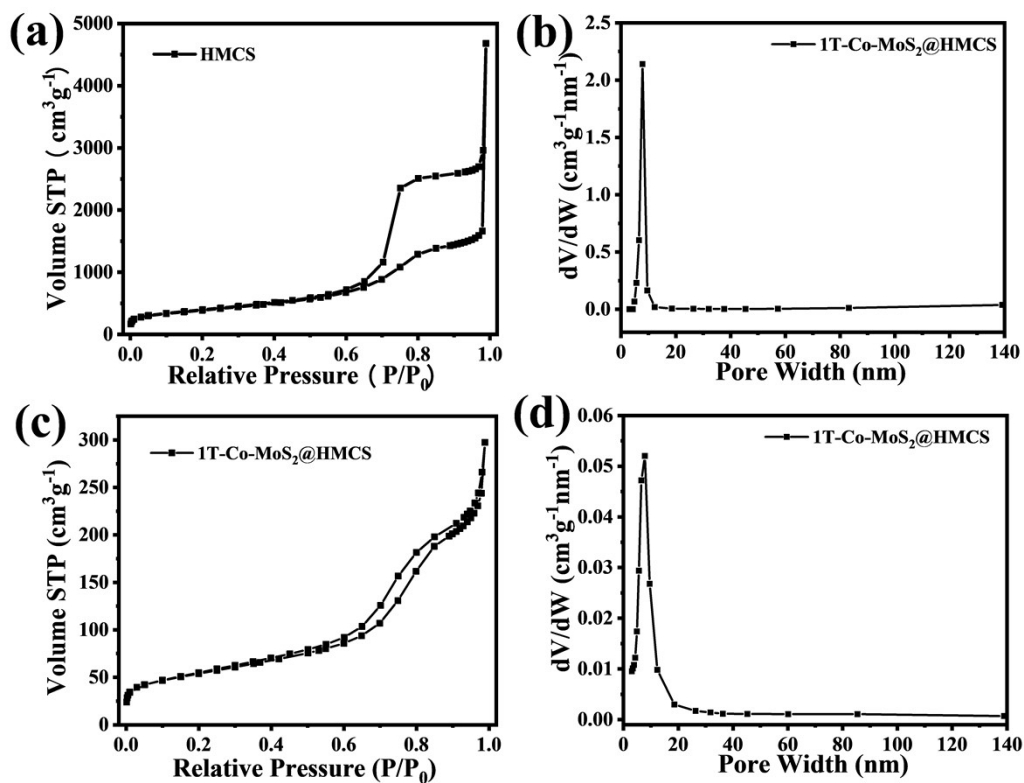

**Fig. S5.** (a) Nitrogen adsorption-desorption isotherms and (b) BJH pore distribution of HMCS, (c) Nitrogen adsorption-desorption isotherms and (d) BJH pore distribution of 1T-Co-MoS<sub>2</sub>@HMCS.

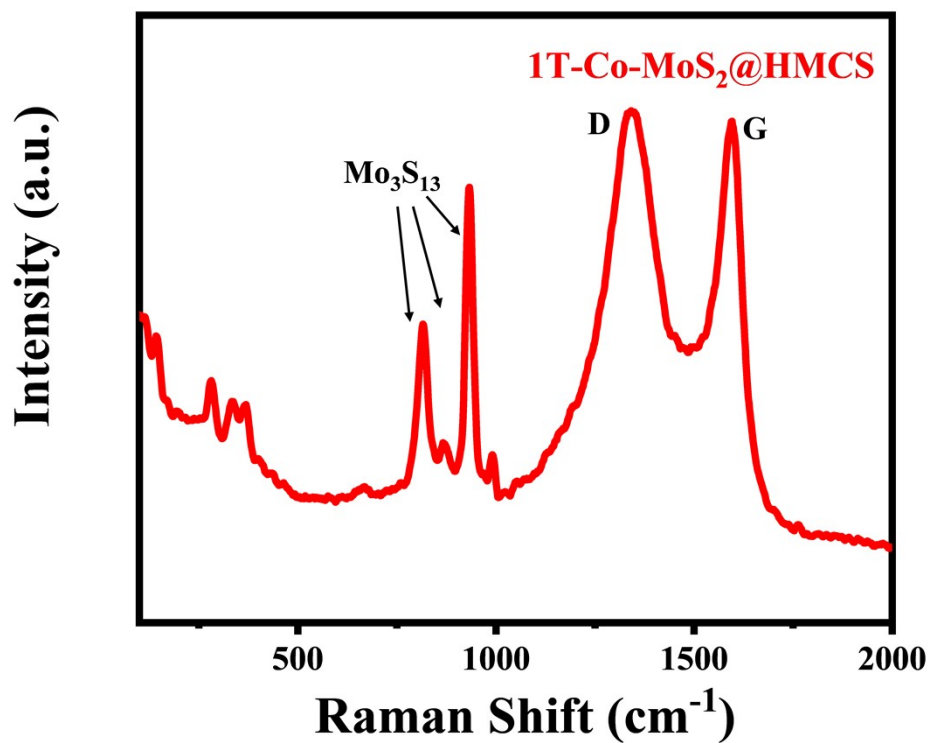

Fig. S6. Raman spectrum of 1T-Co-MoS<sub>2</sub>@HMCS.

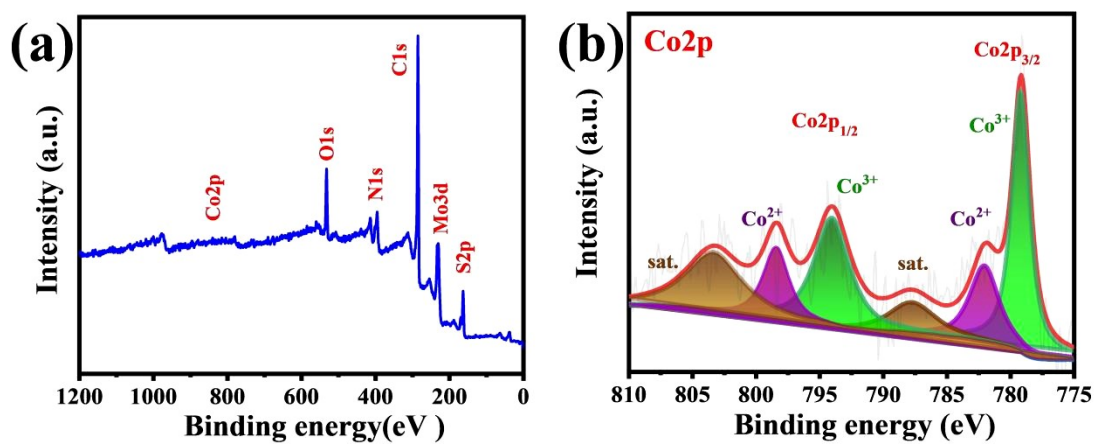

Fig. S7. (a) Full XPS spectrum and (b) high-resolution XPS spectra of Co 2p in 1T-Co-MoS<sub>2</sub>@HMCS catalyst.

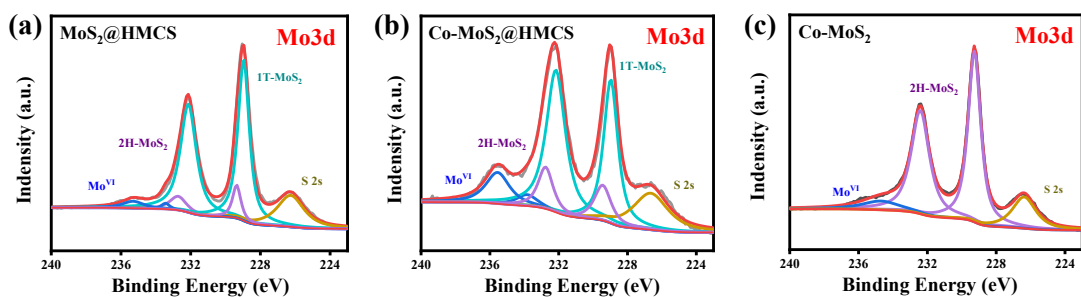

**Fig. S8.** High-resolution XPS spectra of Mo 3d in MoS<sub>2</sub>@HMCS (a), Co-MoS<sub>2</sub>@HMCS (b) and Co-MoS<sub>2</sub> (c).

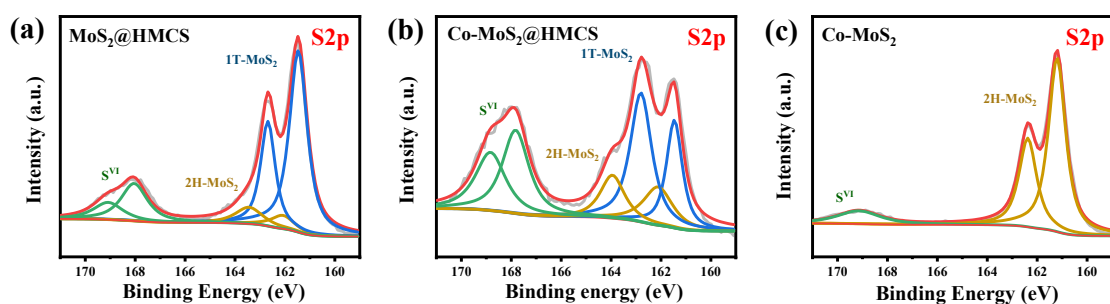

**Fig. S9.** High-resolution XPS spectra of S 2p in MoS<sub>2</sub>@HMCS (a), Co-MoS<sub>2</sub>@HMCS (b) and Co-MoS<sub>2</sub> (c).

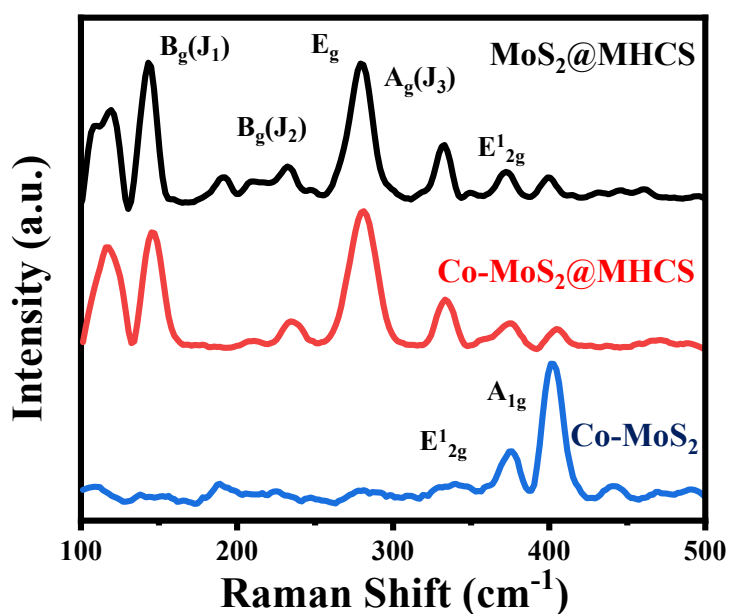

**Fig. S10.** Raman spectrum of MoS<sub>2</sub>@HMCS, Co-MoS<sub>2</sub>@HMCS and Co-MoS<sub>2</sub>.

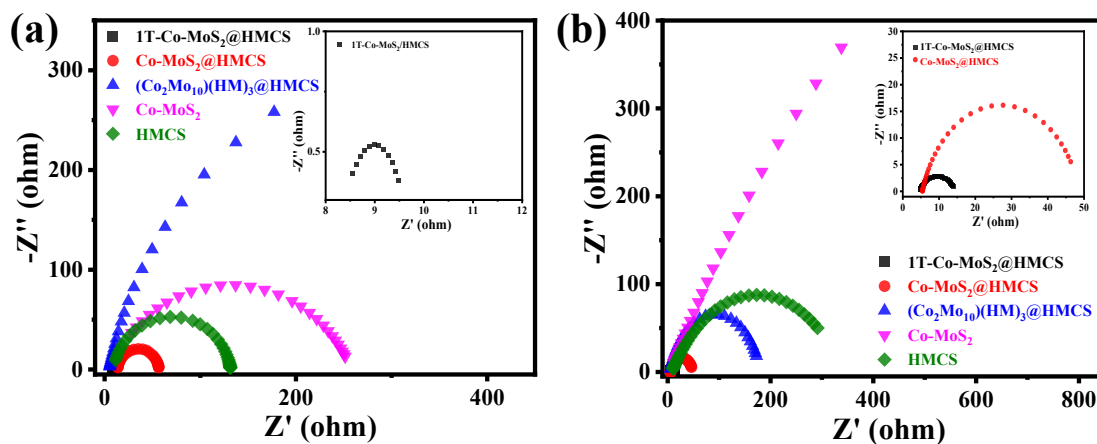

**Fig. S11.** Electrochemical impedance spectroscopy (EIS) of 1T-Co-MoS<sub>2</sub>@HMCS, Co-MoS<sub>2</sub>@HMCS, (Co<sub>2</sub>Mo<sub>10</sub>)(HM)<sub>3</sub>@HMCS, Co-MoS<sub>2</sub> and HMCS tested in (a) 1.0 M KOH and (b) 0.5 M H<sub>2</sub>SO<sub>4</sub>.

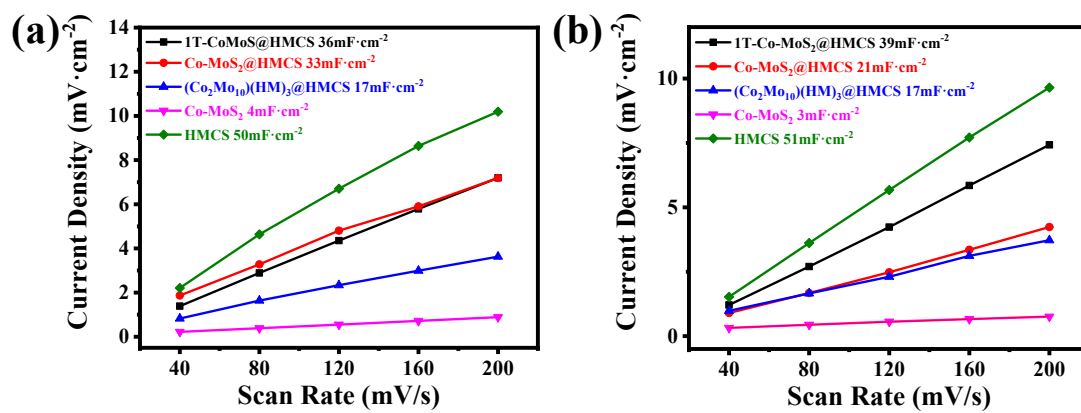

**Fig. S12.** Double-layer capacitance ( $C_{dl}$ ) determined by plotting capacitive currents as function of scan rate in of alkaline (a) and acidic solutions (b).

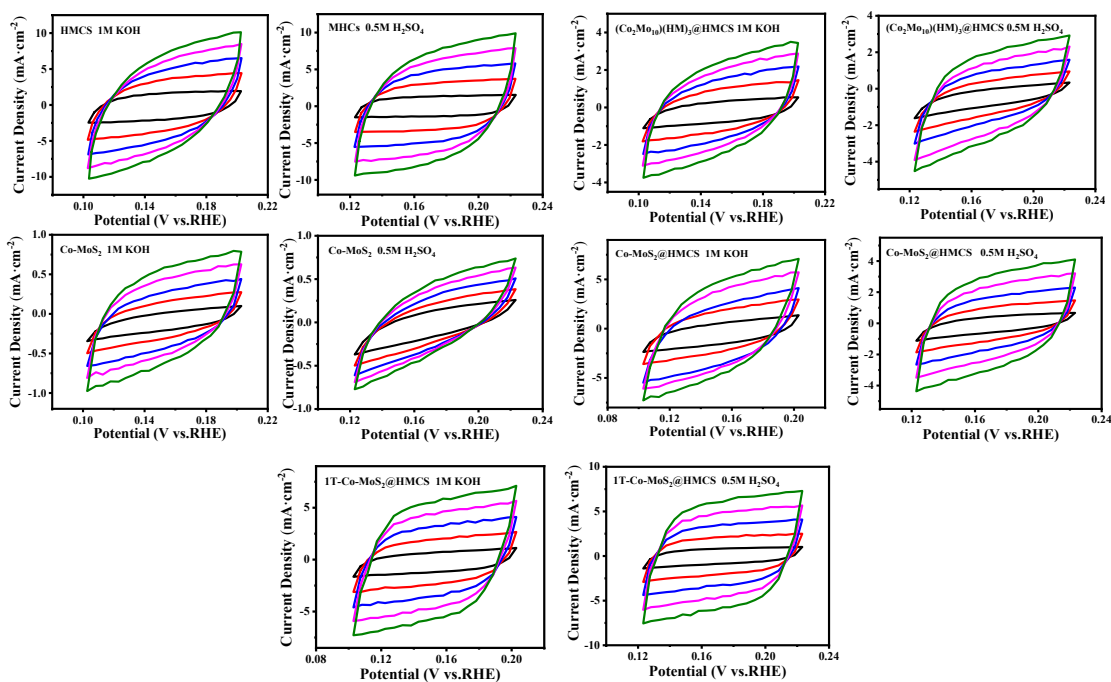

**Fig. S13.** CVs with different scan rates of different catalysts in 1.0 M KOH and 0.5 M  $\text{H}_2\text{SO}_4$ .

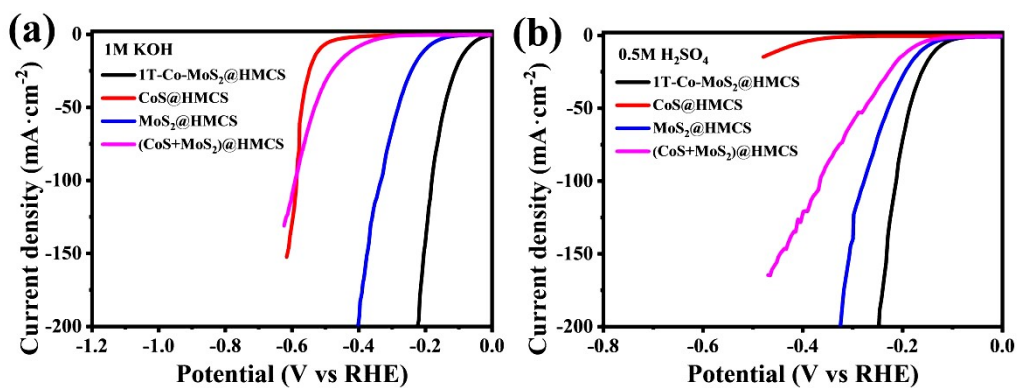

**Fig. S14.** HER polarization curves of different catalysts in 1.0 M KOH (a) and 0.5 M  $\text{H}_2\text{SO}_4$ .

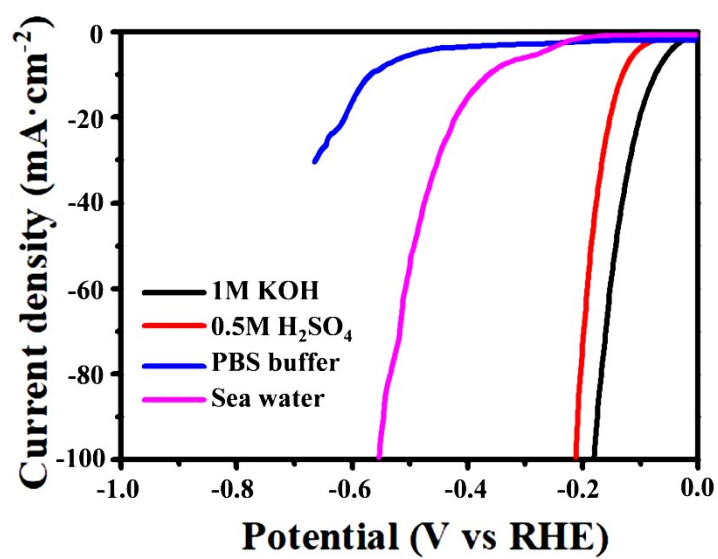

Fig. S15. HER polarization curves of 1T-Co-MoS<sub>2</sub>@HMCS in different solutions.

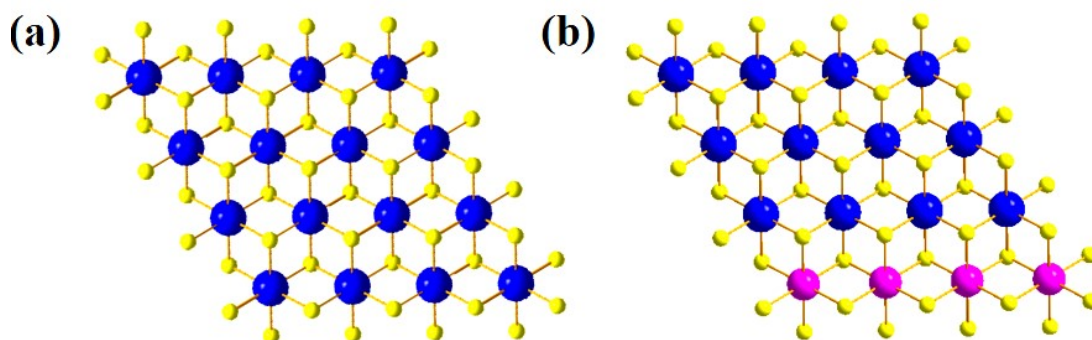

Fig. S16. The calculation model of 1T-MoS<sub>2</sub> and 1T-Co-MoS<sub>2</sub>.

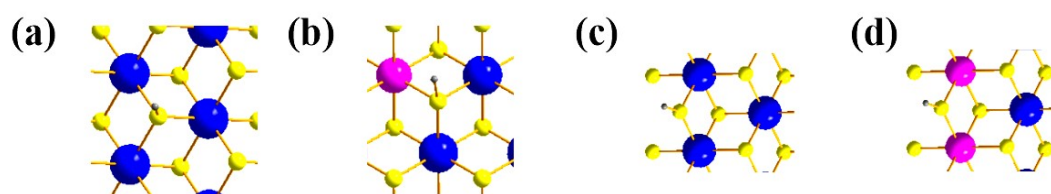

Fig. S17. The adsorption model of 1T-MoS<sub>2</sub> and 1T-Co-MoS<sub>2</sub> in acidic condition.



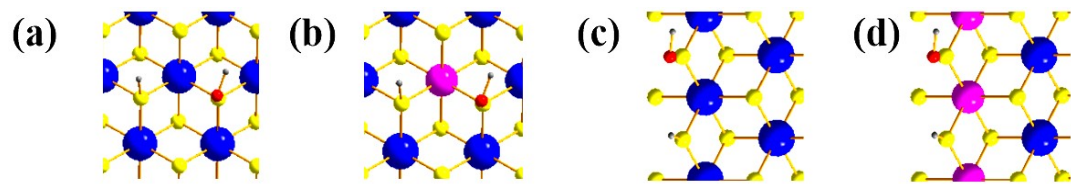

**Fig. S18.** The adsorption model of 1T-MoS<sub>2</sub> and 1T-Co-MoS<sub>2</sub> in alkaline condition.

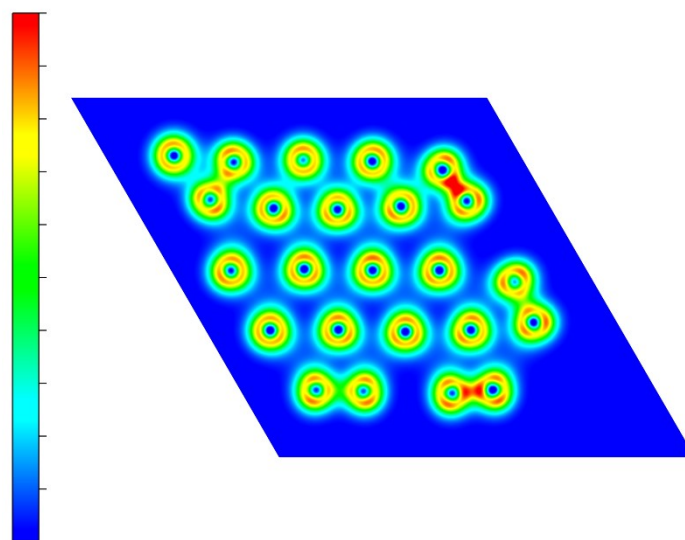

**Fig. S19.** Charge density diagram of 1T-Co-MoS<sub>2</sub>.

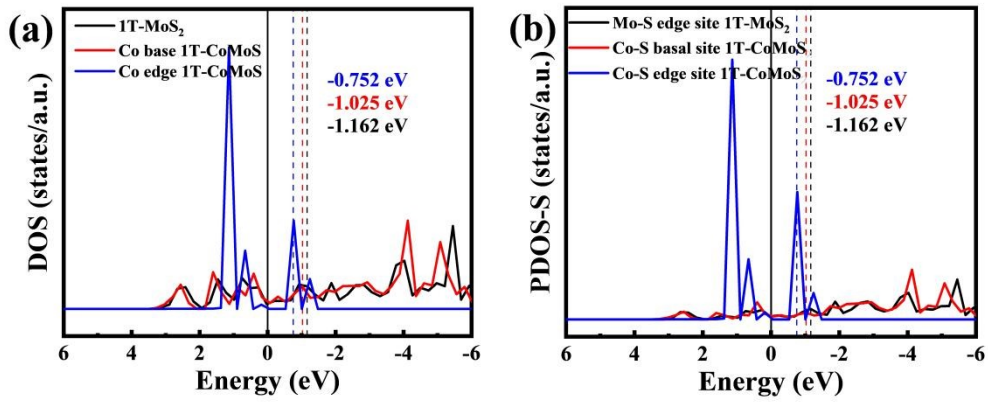

**Fig. S20.** Schematic of DOS and PDOS with different edges of 1T-MoS<sub>2</sub> and 1T-Co-MoS<sub>2</sub>.

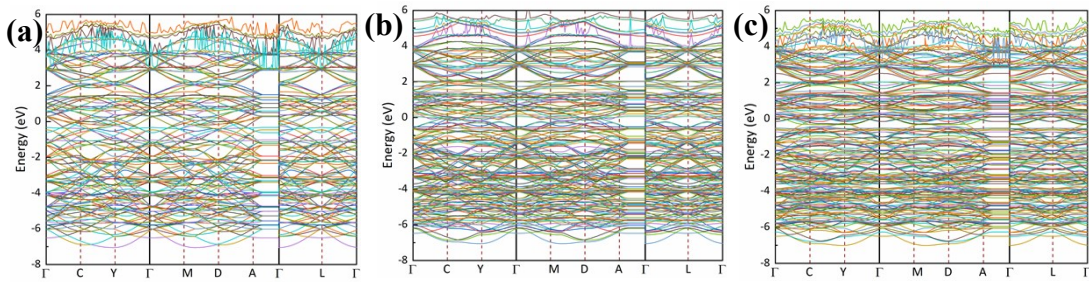

**Fig. S21.** Band structure of the effective model for the d bands of 1T-MoS<sub>2</sub>, Co-S basal site and Co-S edge site of 1T-Co-MoS<sub>2</sub>

**Table S1.** Comparison of HER Performance of 1T-Co-MoS<sub>2</sub>@HMCS with Reported Electrocatalysts in 1.0 M KOH.

| Electrocatalyst                                                                                               | Overpotential $\eta$<br>(mV vs. RHE) | Tafel slops<br>(mV dec <sup>-1</sup> ) | References                                                        |
|---------------------------------------------------------------------------------------------------------------|--------------------------------------|----------------------------------------|-------------------------------------------------------------------|
| 1T-Co-MoS <sub>2</sub> @HMCS                                                                                  | $\eta_{10} = 74$                     | 63                                     | This work                                                         |
| CN/CNL/MoS <sub>2</sub> /CP                                                                                   | $\eta_{10} = 106$                    | 117                                    | <i>Chem. Eng. J.</i> , <b>2021</b> , 412, 128556.                 |
| H-MoS <sub>2</sub> /MoP                                                                                       | $\eta_{10} = 97$                     | 57.8                                   | <i>Small</i> , <b>2020</b> , 16, 2002482.                         |
| Mo <sub>2</sub> S@NSCS                                                                                        | $\eta_{10} = 206$                    | 94                                     | <i>Appl. Catal. B: Environ.</i> , <b>2020</b> , 263, 118352.      |
| V- doped MoS <sub>2</sub>                                                                                     | $\eta_{10} = 206$                    | 89                                     | <i>Appl. Catal. B: Environ.</i> , <b>2019</b> , 254, 432–442.     |
| 1T MoS <sub>2</sub> /Ni <sup>2+<math>\delta</math></sup> O <sub>8</sub> (OH) <sub>2-<math>\delta</math></sub> | $\eta_{10} = 185$                    | 77                                     | <i>Adv. Sci.</i> , <b>2018</b> , 5, 1700644.                      |
| CoMoNiS-NF-31                                                                                                 | $\eta_{10} = 113$                    | 58                                     | <i>J. Am. Chem. Soc.</i> , <b>2019</b> , 141, 26.                 |
| Co-Mo <sub>2</sub> C@NCNT                                                                                     | $\eta_{10} = 186$                    | 79                                     | <i>ACS Sustainable Chem. Eng.</i> , <b>2018</b> , 6, 9912–9920.   |
| Mo <sub>2</sub> C-GNR                                                                                         | $\eta_{10} = 217$                    | 64                                     | <i>ACS. Sustainable. Chem. Eng.</i> , <b>2016</b> , 4, 6313–6321. |
| Mo <sub>2</sub> N-Mo <sub>2</sub> C/HGr                                                                       | $\eta_{10} = 154$                    | 68                                     | <i>Adv. Mater.</i> , <b>2018</b> , 30, 2, 1704156.                |
| O-CoMoS                                                                                                       | $\eta_{10} = 97$                     | 70                                     | <i>ACS Catal.</i> , <b>2018</b> , 8, 4612–4621.                   |
| 1T-MoS <sub>2</sub> /NiS <sub>2</sub>                                                                         | $\eta_{10} = 116$                    | 72                                     | <i>Angew. Chem. Int. Ed.</i> , <b>2019</b> , 58, 17621–17624.     |
| CoS <sub>1.097</sub> /MoS <sub>2</sub>                                                                        | $\eta_{10} = 249$                    | 75                                     | <i>ACS Appl. Energy Mater.</i> , <b>2019</b> , 2, 7504–7511.      |

**Table S2.** Comparison of HER performance of 1T-Co-MoS<sub>2</sub>@HMCS with reported electrocatalysts in 0.5 M H<sub>2</sub>SO<sub>4</sub>.

| Electrocatalyst                                        | Overpotential<br>$\eta$ (mV) | Tafel slops<br>(mV dec <sup>-1</sup> ) | References                                                           |
|--------------------------------------------------------|------------------------------|----------------------------------------|----------------------------------------------------------------------|
| <b>1T-Co-MoS<sub>2</sub>@HMCS</b>                      | $\eta_{10} = 132$            | <b>78</b>                              | <b>This work</b>                                                     |
| 1rGO-MoS <sub>2</sub>                                  | $\eta_{10} = 197$            | 230                                    | <i>ACS Appl. Mater. Interfaces.</i> , <b>2020</b> , 12, 12629–12638. |
| Mo <sub>2</sub> C/N-PC                                 | $\eta_{10} = 178$            | 72                                     | <i>J. Mater. Chem. A</i> , <b>2019</b> , 7, 4734–4743.               |
| np-Mo <sub>2</sub> C                                   | $\eta_{10} = 229$            | 101                                    | <i>Adv. Sci.</i> , <b>2017</b> , 1700601.                            |
| CoS <sub>1.097</sub> /MoS <sub>2</sub>                 | $\eta_{10} = 228$            | 59                                     | <i>ACS Appl. Energy Mater.</i> , <b>2019</b> , 2, 7504–7511.         |
| P-Mo <sub>2</sub> C/Ti <sub>3</sub> C <sub>2</sub> @NC | $\eta_{10} = 177$            | 57.3                                   | <i>ACS Sustainable Chem. Eng.</i> , <b>2020</b> , 8, 12990–12998.    |
| Co–Mo–S/CC                                             | $\eta_{10} = 203$            | 86                                     | <i>Nanoscale</i> , <b>2018</b> , 10, 8404–8412.                      |
| 3DHP-Mo <sub>2</sub> C                                 | $\eta_{10} = 166$            | 75                                     | <i>J. Mater. Chem. A</i> , <b>2017</b> , 5, 20228–20238.             |
| mPF-MoS <sub>2</sub>                                   | $\eta_{10} = 210$            | -                                      | <i>Nat. Commun.</i> , <b>2017</b> , 8, 14430.                        |
| np-Mo <sub>2</sub> C                                   | $\eta_{10} = 229$            | 101                                    | <i>Adv. Sci.</i> , <b>2018</b> , 5, 1700601                          |
| Co/MoS <sub>2</sub>                                    | $\eta_{10} = 156$            | 58                                     | <i>Nano Energy</i> , <b>2017</b> , 39, 409.                          |
| Ni-Fe-LDH-MoS <sub>2</sub> -2                          | $\eta_{10} = 180$            | 82                                     | <i>ACS Energy Lett.</i> <b>2018</b> , 3, 4, 952–960.                 |
| Ni/ $\beta$ -Mo <sub>2</sub> C                         | $\eta_{10} = 155$            | 79                                     | <i>Chem. Commun.</i> , <b>2018</b> , 54, 9901–9904                   |
